# Supplementary material for: Innate cell profiles during the acute and convalescent phase of SARS-CoV-2 infection in children
Source: PubMed Central journal article supplement (PMC7889848; doi:10.1038/s41467-021-21414-x), 2021-02-17
Supplement: 41467_2021_21414_MOESM1_ESM.pdf [file 41467_2021_21414_MOESM1_ESM.pdf]

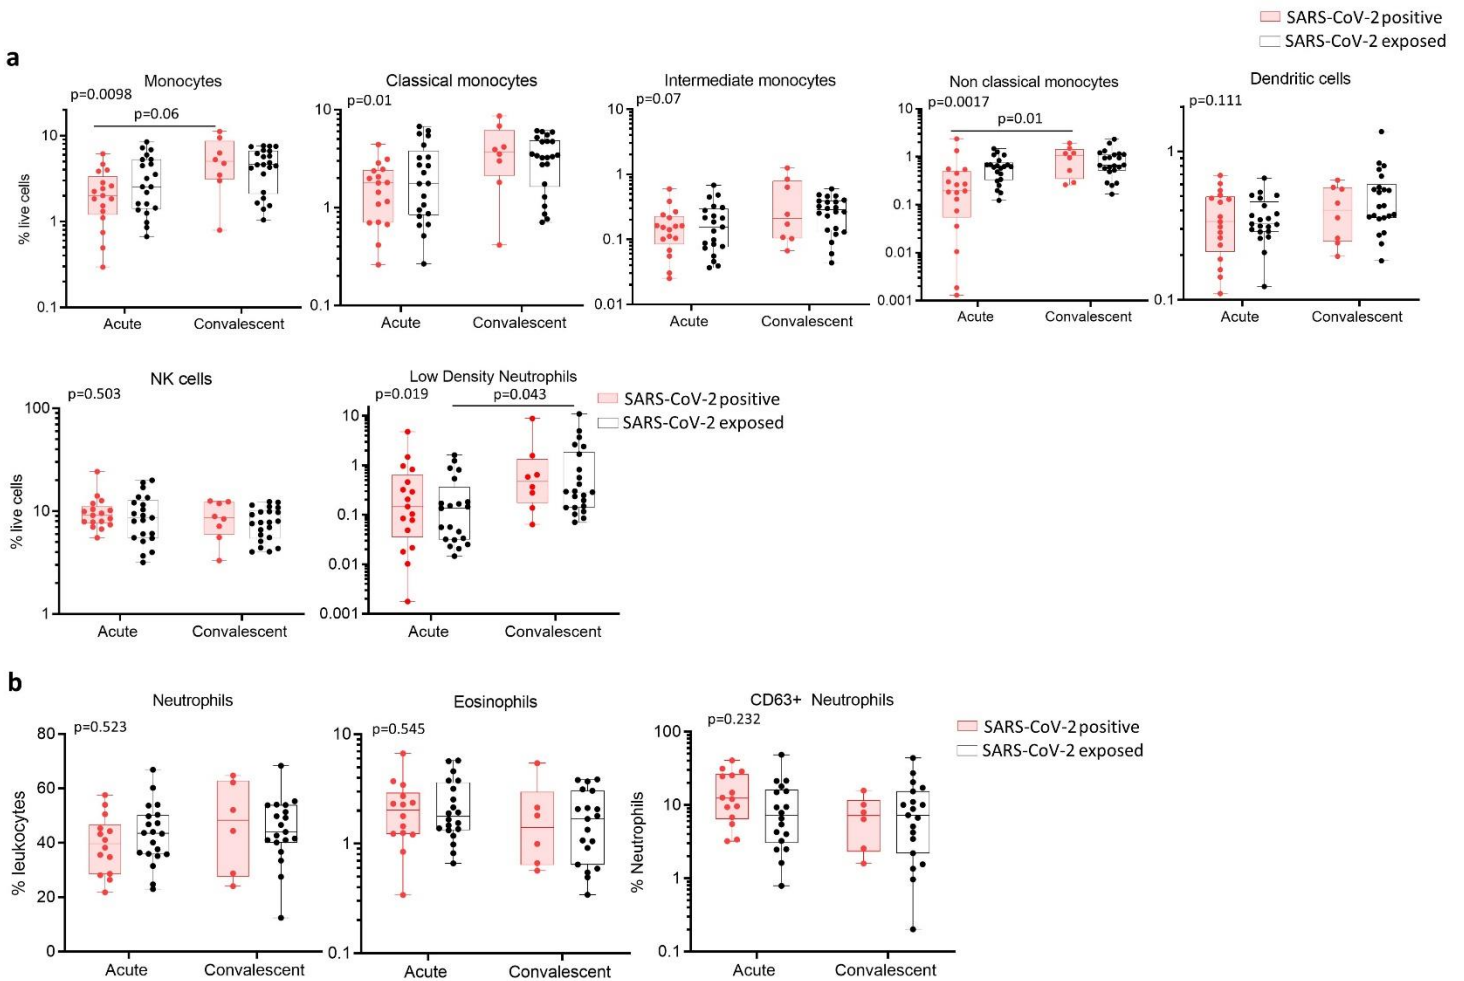

**Supplementary Figure 1. Innate cell profiles of adults infected with or exposed to SARS-CoV-2 during the acute and convalescent phase.** (a) Frequency of monocytes and subsets (classical, non-classical, intermediate), dendritic cells, NK cells and low-density immature neutrophils in PBMC samples of adults during infection (SARS-CoV-2 positive  $n=17$ , SARS-CoV-2 exposed  $n=21$ ) and in convalescence (SARS-CoV-2 positive  $n=8$ , SARS-CoV-2 exposed  $n=22$ ). (b) Frequency of neutrophils and eosinophils in fresh whole blood samples of adults during infection (SARS-CoV-2 positive  $n=14$ , SARS-CoV-2 exposed  $n=20$ ) and in convalescence (SARS-CoV-2 positive  $n=6$ , SARS-CoV-2 exposed  $n=19$ ). P values by Kruskal-Wallis rank sum test and Dunn's multiple comparison testing. All statistical tests were performed two-sided. Boxplots show the medians, the 1<sup>st</sup> and 3<sup>rd</sup> quartile as well as the smallest and largest values as whiskers.

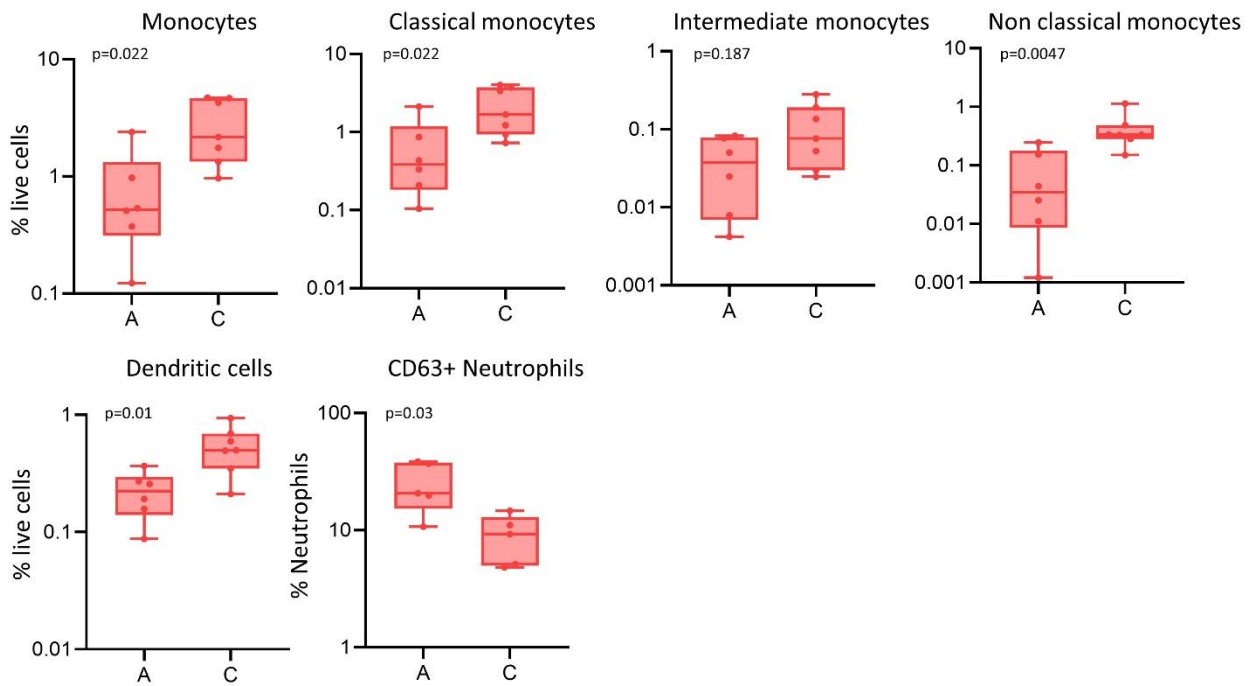

**Supplementary Figure 2. Innate cell profiles of children with SARS-CoV-2 during the acute (A) and convalescent (C) phase, excluding children with weak positive PCR results (CT>30).** Frequency of monocytes and subsets (classical, non-classical, intermediate), dendritic cells and CD63+ neutrophils in samples from SARS-CoV-2 positive children with initial CT<30 (samples collected during acute phase (n=6) and samples collected during convalescence (n=7)). P values by two-sided Mann-Whitney U test. Boxplots show the medians, the 1<sup>st</sup> and 3<sup>rd</sup> quartile as well as the smallest and largest values as whiskers.

### A. Representative PBMC gating

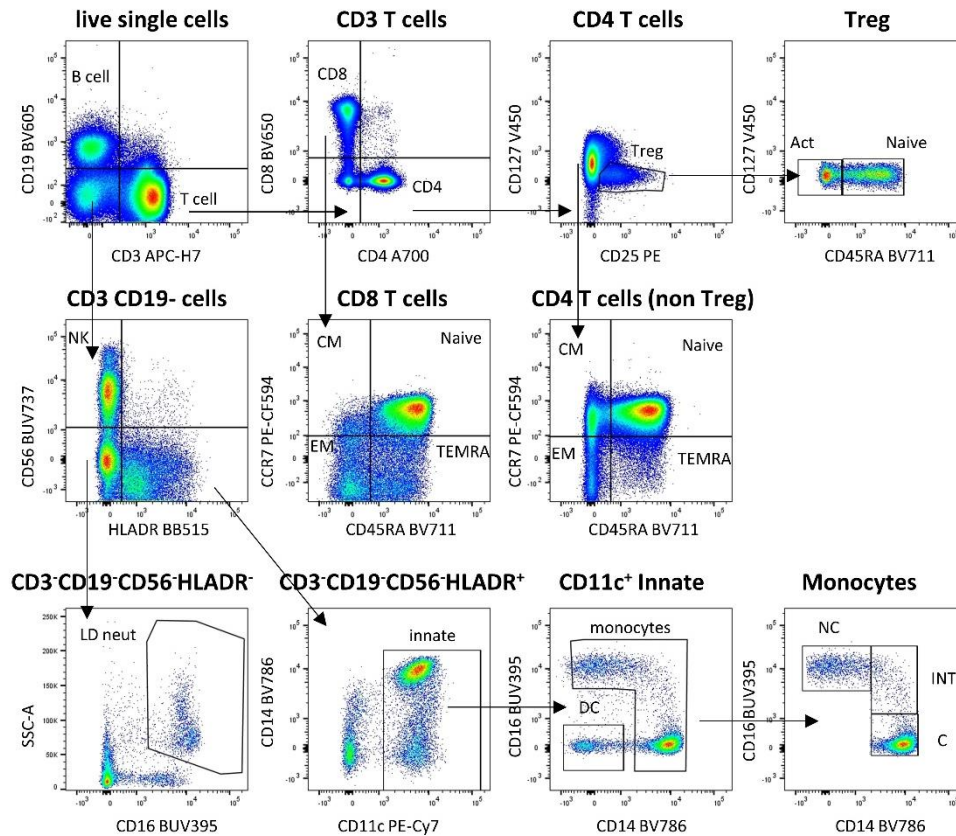

### B. Representative whole blood gating

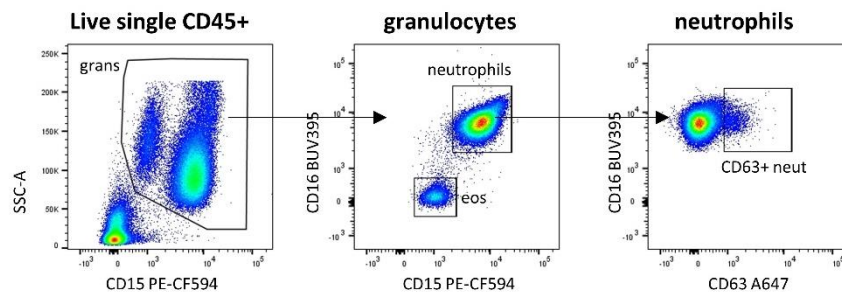

**Supplementary Figure 3. Representative flow cytometry gating strategies for PBMC and whole blood.** (A) Within the PBMC fraction, B cells were selected based on CD19 expression, and the total T cell fraction based on CD3 expression. CD4 and CD8 T cells, and their naïve, effector, memory and regulatory (Treg) subsets were also quantified. CD3<sup>-</sup>CD19<sup>-</sup> cells were classified into NK cells (CD56<sup>+</sup>) and innate cells (HLA-DR<sup>+</sup>). Within the innate cell fraction, CD14<sup>+</sup> monocytes and CD11c<sup>+</sup> DCs were identified. Monocyte subsets were identified based on CD16 expression and classified into classical, intermediate, and non-classical subsets. Low density neutrophils were observed in the PBMC fraction at convalescence, characterised by a high SSC profile and CD16 expression. (B) For whole blood, granulocytes were selected within CD45<sup>+</sup> leukocytes based on their SSC profile and CD15 expression. Neutrophils were CD15<sup>+</sup>CD16<sup>+</sup> and eosinophils were CD15<sup>+</sup>CD16<sup>-</sup>. CD63 expression was investigated within the neutrophil population.

**Supplementary Table 1.** Flow cytometry antibody cocktails

| <b>Surface Marker</b>    | <b>Fluorophore</b> | <b>Clone</b> | <b>Final Dilution</b> |
|--------------------------|--------------------|--------------|-----------------------|
| <b>Whole blood panel</b> |                    |              |                       |
| CD14                     | BV786              | M5E2         | 1:50                  |
| CD11b                    | BUV805             | ICRF44       | 1:100                 |
| CD45                     | BV711              | HI30         | 1:100                 |
| CD56                     | BUV737             | NCAM16.2     | 1:100                 |
| CD11c                    | PE-Cy7             | B-ly6        | 1:100                 |
| CD63                     | A647               | H5C6         | 1:100                 |
| CD4                      | A700               | RPA-T4       | 1:100                 |
| CD3                      | BB515              | UCHTI        | 1:100                 |
| PD1                      | BB700              | EH12.1       | 1:100                 |
| CD15                     | PE-CF594           | W6D3         | 1:200                 |
| HLADR                    | V500               | G46-6        | 1:200                 |
| CD19                     | BV605              | SJ25C1       | 1:200                 |
| CD8                      | BV650              | RPA-T8       | 1:200                 |
| CD16                     | BUV395             | 3G8          | 1:400                 |
| Live/dead                | N-IR               |              |                       |
| <b>PBMC panel</b>        |                    |              |                       |
| CD25                     | PE                 | M-A251       | 1:25                  |
| CD127                    | V450               | HIL7RM21     | 1:50                  |
| CD3                      | APCH7              | SK7          | 1:50                  |
| CD14                     | BV786              | M5E2         | 1:50                  |
| CD45RA                   | BV711              | HI100        | 1:100                 |
| HLADR                    | BB515              | G46-6        | 1:100                 |
| CD56                     | BUV737             | NCAM16.2     | 1:100                 |
| CD11c                    | PE-Cy7             | B-ly6        | 1:100                 |
| CD4                      | A700               | RPA-T4       | 1:100                 |
| PD1                      | BB700              | EH12.1       | 1:100                 |
| CCR7                     | PE-CF594           | 150503       | 1:200                 |
| CD19                     | BV605              | SJ25C1       | 1:200                 |
| CD8                      | BV650              | RPA-T8       | 1:200                 |
| CD16                     | BUV395             | 3G8          | 1:400                 |
| Live/dead                | BV510              |              |                       |
