# Supplementary material for: Innate cell profiles during the acute and convalescent phase of SARS-CoV-2 infection in children
Source: PubMed Central journal article supplement (PMC7889848; doi:10.1038/s41467-021-21414-x), 2021-02-17
Supplement: 41467_2021_21414_MOESM2_ESM.pdf [file 41467_2021_21414_MOESM2_ESM.pdf]

## **Description of Additional Supplementary Files**

**Supplementary Data 1.** Clinical details of included participants, including SARS-CoV-2 PCR CT scores, SARS-CoV-2 serology results, symptom data and other respiratory viral testing results.
